# Supplementary material for: Nitrogen regulation in polyester-based carbons and adsorption of gaseous benzene and ethyl acetate
Source: Royal Society of Chemistry journal article supplement (doi:10.1039/d4ra07004f), 2024-01-01
Supplement: d4ra07004f1.pdf [file d4ra07004f1.pdf]

# Supporting Information

## Nitrogen regulation on polyester-based carbons and adsorption towards gaseous benzene and ethyl acetate

Gang Wang <sup>a</sup>, Pingping Tan <sup>a</sup>, Ziyang Kong <sup>a</sup>, Jianfang Ao <sup>b</sup>, Ran Wang <sup>a,\*</sup>, Zhongshen Zhang <sup>c</sup>,  
Zhengping Hao <sup>c,\*</sup>

<sup>a</sup> School of Material Design & Engineering, Beijing Institute of Fashion Technology, Beijing,  
100092, China

<sup>b</sup> Hubei Weipu Testing Technology Co., Ltd., Wuhan, 430205, China

<sup>c</sup> National Engineering Laboratory for VOCs Pollution Control Material & Technology, Research  
Center for Environmental Material and Pollution Control Technology, University of Chinese  
Academy of Sciences, Beijing, 101408, China

\* Corresponding author.

E-mail: clywr@bift.edu.cn; zphao@ucas.ac.cn

### Contents

**Table S1.** Physical and chemical properties of various nitrogen sources.

**Fig. S1.** The thermogravimetric (TG) and derivative of the thermogravimetric (DTG)  
curve of activated carbon.

**Fig. S2.** XPS spectra of C-P, C-D and C-Y.

**Fig. S3.** Relationship between the adsorbed amounts of ethyl acetate and the structural  
parameters as well as the element compositions.

**Table S1.** Physical and chemical properties of various nitrogen sources<sup>1</sup>.

| Chemical Name              | Melamine                                                                          | Pyridine                                                                          | Dimethylamine                                                                      | Pyrrole                                                                             |
|----------------------------|-----------------------------------------------------------------------------------|-----------------------------------------------------------------------------------|------------------------------------------------------------------------------------|-------------------------------------------------------------------------------------|
| Chemical Structure         | 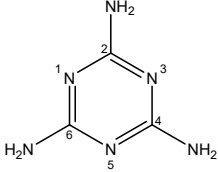 |  |  |  |
| Chemical Formula           | $C_3H_6N_6$                                                                       | $C_5H_5N$                                                                         | $C_2H_7N$                                                                          | $C_4H_5N$                                                                           |
| Molecular Weight           | 126.1                                                                             | 79.1                                                                              | 45.1                                                                               | 67.1                                                                                |
| Melting Point/ $^{\circ}C$ | 345                                                                               | -41.6                                                                             | -93                                                                                | -24                                                                                 |
| Boiling Point/ $^{\circ}C$ | Sublimes                                                                          | 115.3                                                                             | 7.3                                                                                | 129.7                                                                               |

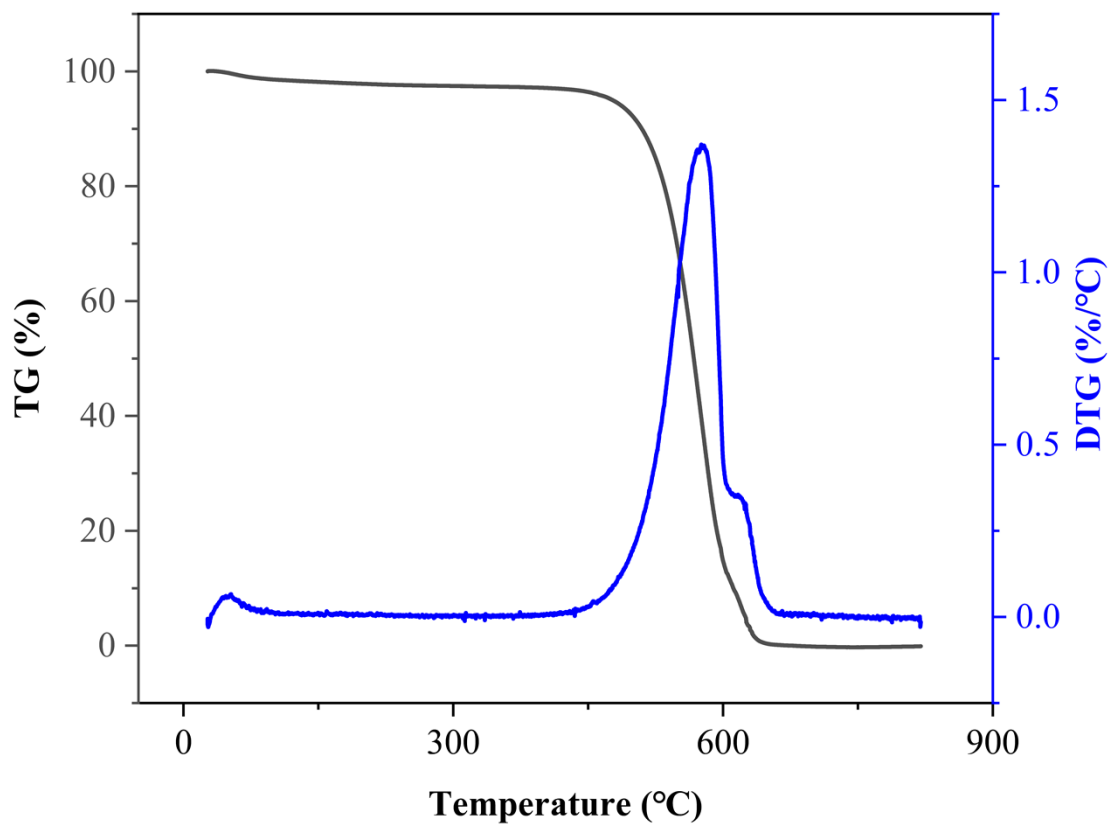

**Fig. S1.** The thermogravimetric (TG) and derivative of the thermogravimetric (DTG) curve of activated carbon.

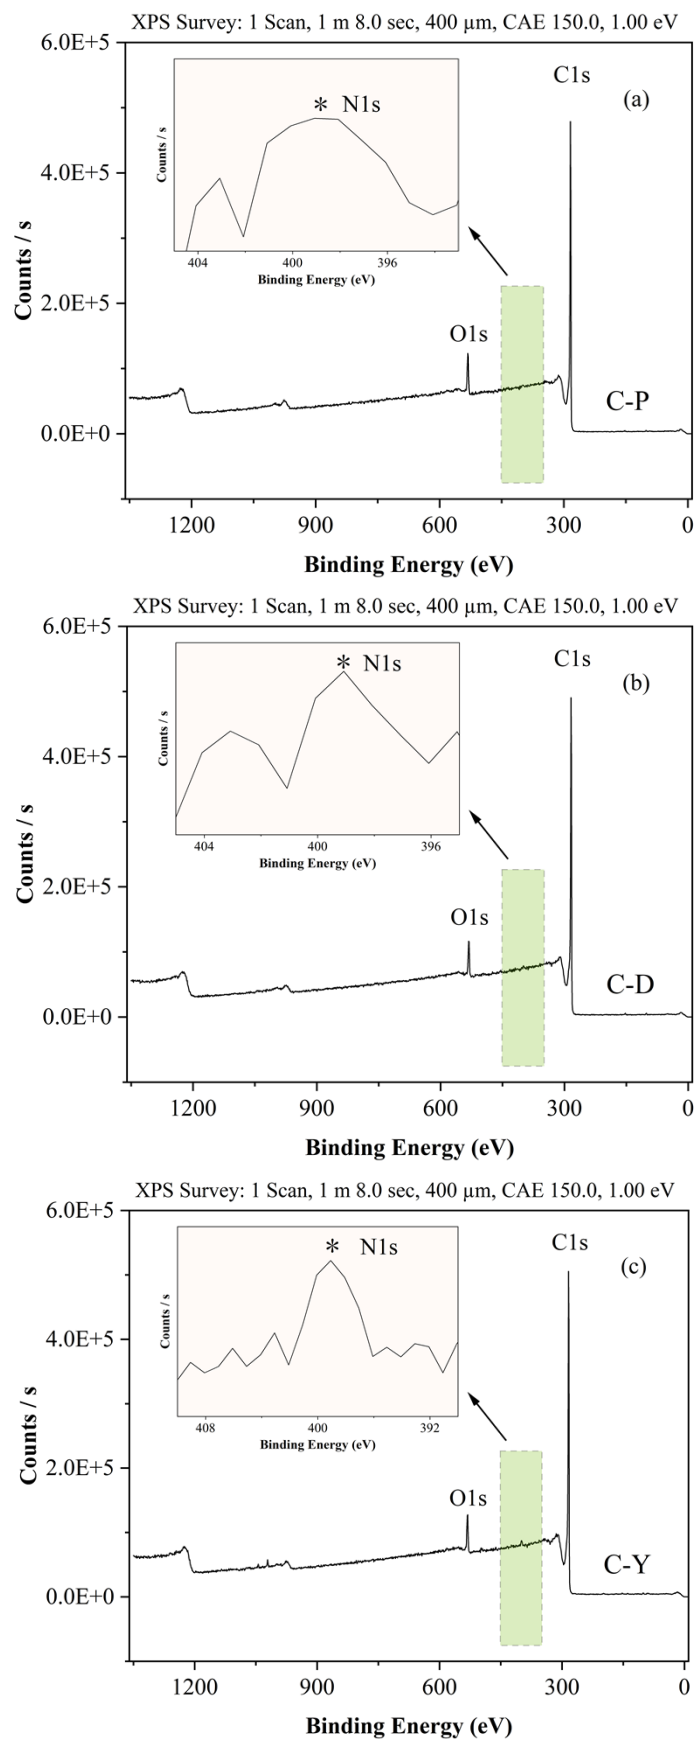

**Fig. S2.** XPS spectra of C-P, C-D and C-Y.

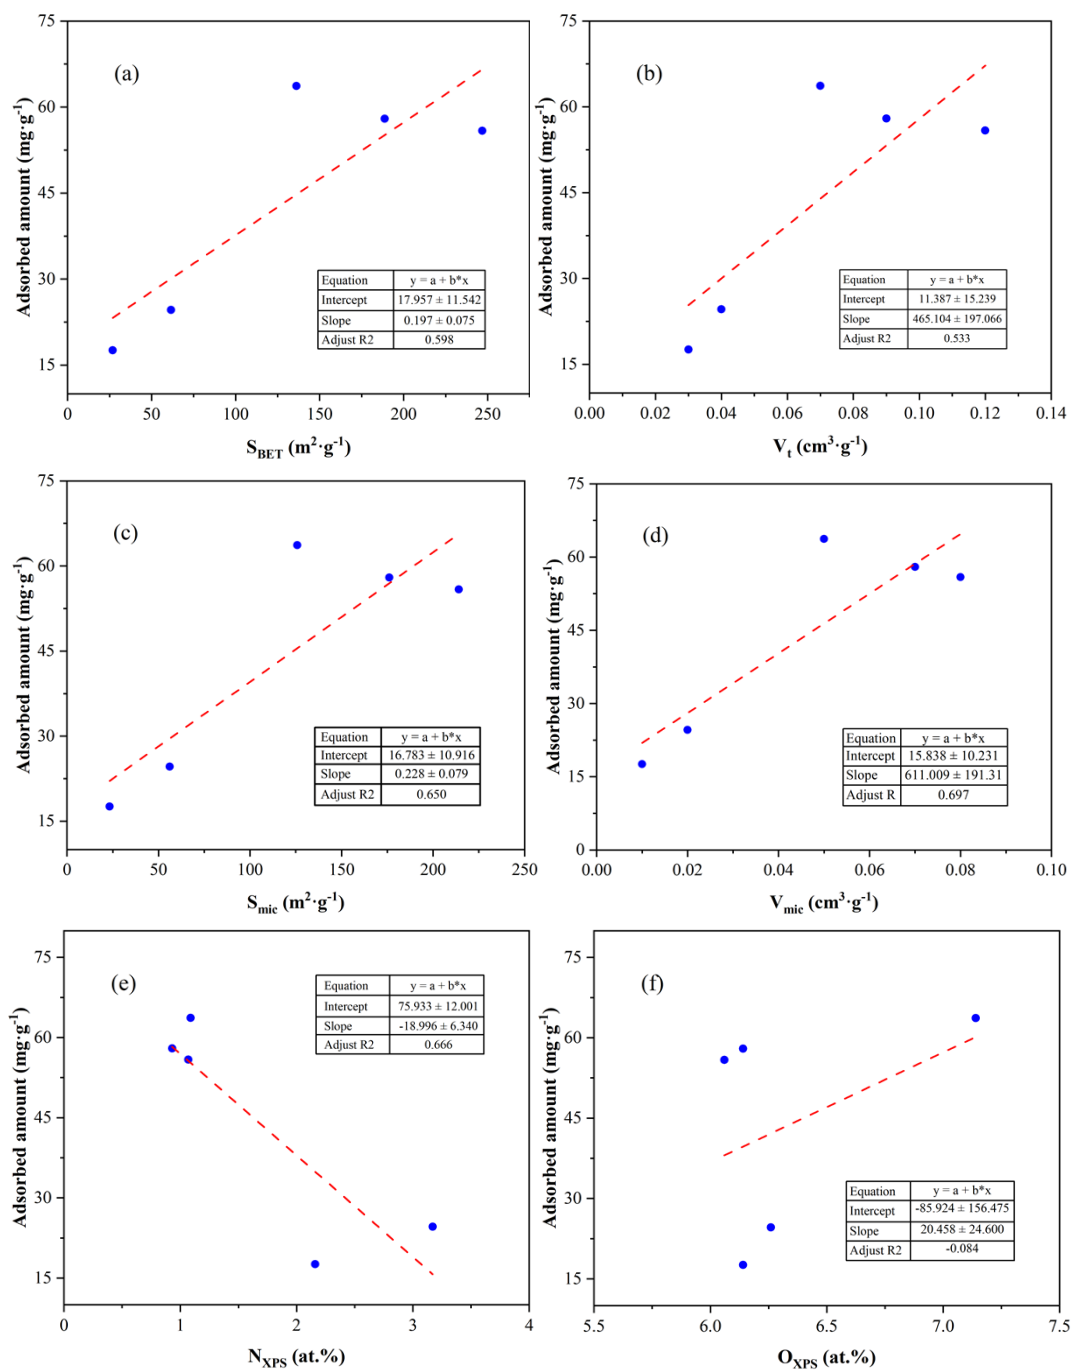

**Fig. S3.** Relationship between the adsorbed amounts of ethyl acetate and the structural parameters as well as the element compositions.

## Reference

1. National Library of Medicine. Pubchem. <https://pubchem.ncbi.nlm.nih.gov> (accessed 2024-7-20).
